# Supplementary material for: Frequency of Pathogenic Germline Variants in CDH1, BRCA2, CHEK2, PALB2, BRCA1, and TP53 in Sporadic Lobular Breast Cancer
Source: Oxford University Press journal article supplement (doi:10.1158/1055-9965.epi-18-1102), 2019-07-01
Supplement: 10559965epi181102-sup-210227_3_supp_5391266_p660t6.xlsx [file 10559965epi181102-sup-210227_3_supp_5391266_p660t6.xlsx]

## Sheet: supp_table
Chr	Start	Stop	Pathology	A1	A2	Gene	Type	Nt Change	AA change	dbSNP	1KG	ExAC	EVS	Read depth	Reference Allele Counts	Alternative Allele Counts	Alternative allele frequency
chr17	41244867	41244868	ILC	TT	-	BRCA1	frameshift deletion	c.2680_2681del	p.K894fs		0	0	0	50	15	35	0.7
chr13	32906872	32906872	ILC	T	-	BRCA2	frameshift deletion	c.1257delT	p.C419fs	RS80359272	0	0	0	708	327	381	0.538136
chr13	32906924	32906927	ILC	AAAG	-	BRCA2	frameshift deletion	c.1309_1312del	p.K437fs	rs80359279	0	0	0	562	293	269	0.478648
chr13	32907004	32907005	ILC	AG	-	BRCA2	frameshift deletion	c.1389_1390del	p.T463fs	rs80359283	0	0	0	580	285	295	0.508621
chr13	32912090	32912091	ILC	TG	-	BRCA2	frameshift deletion	c.3598_3599del	p.C1200fs	rs80359391	0	0	0	1536	841	695	0.452474
chr13	32912172	32912173	ILC	TG	-	BRCA2	frameshift deletion	c.3680_3681del	p.L1227fs	rs80359395	0	0	0	1275	655	620	0.486275
chr13	32914327	32914327	ILC	-	A	BRCA2	frameshift insertion	c.5835dupA	p.I1945fs	rs80359542	0	0	0	1236	645	591	0.478155
chr13	32914438	32914438	Control	T	-	BRCA2	frameshift deletion	c.5946delT	p.S1982fs	RS80359550	0.0002	0.0003	0	316	176	140	0.443038
chr13	32914438	32914438	ILC	T	-	BRCA2	frameshift deletion	c.5946delT	p.S1982fs	RS80359550	0.0002	0.0003	0	380	187	193	0.507895
chr13	32914438	32914438	ILC	T	-	BRCA2	frameshift deletion	c.5946delT	p.S1982fs	RS80359550	0.0002	0.0003	0	386	216	170	0.440415
chr13	32914560	32914560	ILC	A	-	BRCA2	frameshift deletion	c.6068delA	p.D2023fs	NOVEL	0	0	0	653	338	315	0.482389
chr13	32911104	32911104	Control	C	A	BRCA2	stopgain	c.C2612A	p.S871X	RS397507634	0	0	0	509	248	261	0.51277
chr13	32913464	32913464	ILC	C	T	BRCA2	stopgain	c.C4972T	p.Q1658X	NOVEL	0	0	0	382	234	148	0.387435
chr13	32914137	32914137	ILC	C	A	BRCA2	stopgain	c.C5645A	p.S1882X	RS80358785	0	2.49e-05	0	748	484	264	0.352941
chr13	32932018	32932018	ILC	G	A	BRCA2	stopgain	c.G7757A	p.W2586X	RS80359003	0	0	0	1039	484	555	0.534167
chr13	32937327	32937327	ILC	A	T	BRCA2	nonsynonymous SNV	c.A7988T	p.E2663V	RS80359031	0	0	0	383	175	208	0.543081
chr13	32937506	32937506	ILC	G	C	BRCA2	nonsynonymous SNV	c.G8167C	p.D2723H	RS41293511	0	0	0	506	258	248	0.490119
chr13	32937506	32937506	ILC	G	C	BRCA2	nonsynonymous SNV	c.G8167C	p.D2723H	RS41293511	0	0	0	535	285	250	0.46729
chr13	32890623	32890623	ILC	C	-	BRCA2	frameshift deletion	c.26delC	p.P9fs	rs80359343	0	0	0	247	107	140	0.566802
chr13	32890623	32890623	ILC	C	-	BRCA2	frameshift deletion	c.26delC	p.P9fs	rs80359343	0	0	0	316	147	169	0.53481
chr13	32890633	32890633	ILC	-	T	BRCA2	frameshift insertion	c.36dupT	p.F12fs	rs80359393	0	0	0	297	152	145	0.488215
chr13	32953644	32953645	ILC	AA	-	BRCA2	frameshift deletion	c.8945_8946del	p.K2982fs	NOVEL	0	0	0	426	198	228	0.535211
chr13	32968863	32968863	ILC	C	G	BRCA2	stopgain	c.C9294G	p.Y3098X	RS80359200	0	8.51e-06	0	280	124	156	0.557143
chr13	32968863	32968863	LCIS	C	G	BRCA2	stopgain	c.C9294G	p.Y3098X	RS80359200	0	8.51e-06	0	326	160	166	0.509202
chr13	32968951	32968951	ILC	C	T	BRCA2	stopgain	c.C9382T	p.R3128X	RS80359212	0	1.65e-05	0	345	168	177	0.513043
chr13	32972693	32972693	ILC	A	-	BRCA2	frameshift deletion	c.10043delA	p.N3348fs	NOVEL	0	0	0	714	381	333	0.466387
chr13	32972370	32972370	ILC	T	-	BRCA2	frameshift deletion	c.9720delT	p.V3240fs	NOVEL	0	0	0	691	322	369	0.534009
chr13	32900634	32900634	ILC	A	G	BRCA2	splicing	c.517-2A>G		RS81002858	0	0	0	537	245	292	0.543762
chr13	32903606	32903607	ILC	GT	-	BRCA2	frameshift deletion	c.658_659del	p.V220fs	rs80359604	0	0	0	112	52	60	0.535714
chr13	32903610	32903611	ILC	TT	-	BRCA2	frameshift deletion	c.662_663del	p.F221fs	rs80359609	0	0	0	163	127	36	0.220859
chr13	32905129	32905132	ILC	ACAG	-	BRCA2	frameshift deletion	c.755_758del	p.D252fs	rs80359659	0	0	0	982	492	490	0.498982
chr13	32905129	32905132	ILC	ACAG	-	BRCA2	frameshift deletion	c.755_758del	p.D252fs	rs80359659	0	0	0	1694	879	815	0.48111
chr16	68771367	68771367	ILC	G	A	CDH1	splicing	c.48+1G>A			0	0	0	19	13	6	0.315789
chr16	68771321	68771321	ILC	G	A	CDH1	nonsynonymous SNV	c.G3A	p.M1I		0	0	0	33	23	10	0.30303
chr16	68849563	68849563	ILC	-	C	CDH1	frameshift insertion	c.1466dupC	p.P489fs		0	0	0	1290	655	635	0.492248
chr16	68857307	68857307	ILC	G	T	CDH1	stopgain	c.G1942T	p.E648X		0	0	0	361	188	173	0.479224
chr16	68863659	68863659	ILC	C	-	CDH1	frameshift deletion	c.2398delC	p.R800fs		0	0	0	804	382	422	0.524876
chr16	68867349	68867349	ILC	G	-	CDH1	frameshift deletion	c.2596delG	p.G866fs		0	0	0	606	317	289	0.476898
chr16	68772210	68772210	LCIS	G	A	CDH1	stopgain	c.G59A	p.W20X	RS121964875	0	0	0	1878	917	961	0.511715
chr22	29091857	29091857	ILC	G	-	CHEK2	frameshift deletion	c.1100delC	p.T367fs	RS555607708	0.0012	0.0018	0.000998403	367	195	172	0.468665
chr22	29091857	29091857	ILC	G	-	CHEK2	frameshift deletion	c.1100delC	p.T367fs	RS555607708	0.0012	0.0018	0.000998403	454	250	204	0.449339
chr22	29107992	29107992	LCIS	C	A	CHEK2	stopgain	c.G697T	p.E233X		0	0	0	1172	699	473	0.403584
chr22	29091857	29091857	LCIS	G	-	CHEK2	frameshift deletion	c.1100delC	p.T367fs	RS555607708	0.0012	0.0018	0.000998403	153	69	84	0.54902
chr22	29091857	29091857	ILC	G	-	CHEK2	frameshift deletion	c.1100delC	p.T367fs	RS555607708	0.0012	0.0018	0.000998403	191	121	70	0.366492
chr22	29091857	29091857	ILC	G	-	CHEK2	frameshift deletion	c.1100delC	p.T367fs	RS555607708	0.0012	0.0018	0.000998403	207	97	110	0.531401
chr22	29091857	29091857	ILC	G	-	CHEK2	frameshift deletion	c.1100delC	p.T367fs	RS555607708	0.0012	0.0018	0.000998403	216	116	100	0.462963
chr22	29091857	29091857	LCIS	G	-	CHEK2	frameshift deletion	c.1100delC	p.T367fs	RS555607708	0.0012	0.0018	0.000998403	217	120	97	0.447005
chr22	29091857	29091857	ILC	G	-	CHEK2	frameshift deletion	c.1100delC	p.T367fs	RS555607708	0.0012	0.0018	0.000998403	224	121	103	0.459821
chr22	29091857	29091857	ILC	G	-	CHEK2	frameshift deletion	c.1100delC	p.T367fs	RS555607708	0.0012	0.0018	0.000998403	257	143	114	0.44358
chr22	29091857	29091857	LCIS	G	-	CHEK2	frameshift deletion	c.1100delC	p.T367fs	RS555607708	0.0012	0.0018	0.000998403	270	169	101	0.374074
chr22	29091857	29091857	LCIS	G	-	CHEK2	frameshift deletion	c.1100delC	p.T367fs	RS555607708	0.0012	0.0018	0.000998403	286	166	120	0.41958
chr22	29091857	29091857	ILC	G	-	CHEK2	frameshift deletion	c.1100delC	p.T367fs	RS555607708	0.0012	0.0018	0.000998403	289	145	144	0.49827
chr22	29091857	29091857	Control	G	-	CHEK2	frameshift deletion	c.1100delC	p.T367fs	RS555607708	0.0012	0.0018	0.000998403	301	153	148	0.491694
chr22	29091857	29091857	ILC	G	-	CHEK2	frameshift deletion	c.1100delC	p.T367fs	RS555607708	0.0012	0.0018	0.000998403	302	178	124	0.410596
chr22	29091857	29091857	Control	G	-	CHEK2	frameshift deletion	c.1100delC	p.T367fs	RS555607708	0.0012	0.0018	0.000998403	309	168	141	0.456311
chr22	29091857	29091857	LCIS	G	-	CHEK2	frameshift deletion	c.1100delC	p.T367fs	RS555607708	0.0012	0.0018	0.000998403	314	139	175	0.557325
chr22	29091857	29091857	ILC	G	-	CHEK2	frameshift deletion	c.1100delC	p.T367fs	RS555607708	0.0012	0.0018	0.000998403	326	197	129	0.395706
chr22	29091857	29091857	Control	G	-	CHEK2	frameshift deletion	c.1100delC	p.T367fs	RS555607708	0.0012	0.0018	0.000998403	332	180	152	0.457831
chr22	29091857	29091857	LCIS	G	-	CHEK2	frameshift deletion	c.1100delC	p.T367fs	RS555607708	0.0012	0.0018	0.000998403	353	182	171	0.484419
chr22	29091857	29091857	LCIS	G	-	CHEK2	frameshift deletion	c.1100delC	p.T367fs	RS555607708	0.0012	0.0018	0.000998403	358	204	154	0.430168
chr22	29091857	29091857	ILC	G	-	CHEK2	frameshift deletion	c.1100delC	p.T367fs	RS555607708	0.0012	0.0018	0.000998403	364	183	181	0.497253
chr22	29091857	29091857	ILC	G	-	CHEK2	frameshift deletion	c.1100delC	p.T367fs	RS555607708	0.0012	0.0018	0.000998403	435	228	207	0.475862
chr22	29091857	29091857	LCIS	G	-	CHEK2	frameshift deletion	c.1100delC	p.T367fs	RS555607708	0.0012	0.0018	0.000998403	436	228	208	0.477064
chr22	29091857	29091857	ILC	G	-	CHEK2	frameshift deletion	c.1100delC	p.T367fs	RS555607708	0.0012	0.0018	0.000998403	467	245	222	0.475375
chr22	29091857	29091857	Control	G	-	CHEK2	frameshift deletion	c.1100delC	p.T367fs	RS555607708	0.0012	0.0018	0.000998403	543	300	243	0.447514
chr22	29091228	29091228	ILC	A	-	CHEK2	frameshift deletion	c.1262delT	p.L421fs		0	0	0	48	24	24	0.5
chr22	29091228	29091228	ILC	A	-	CHEK2	frameshift deletion	c.1262delT	p.L421fs		0	0	0	113	63	50	0.442478
chr22	29085205	29085205	Control	T	C	CHEK2	splicing	c.1462-2A>G		RS587782575	0	0	0	84	61	23	0.27381
chr22	29130521	29130521	LCIS	-	G	CHEK2	frameshift insertion	c.188_189insC	p.L63fs		0	0	0	1210	805	405	0.334711
chr22	29130427	29130427	ILC	G	A	CHEK2	stopgain	c.C283T	p.R95X	RS587781269	0	1.65e-05	0	379	184	195	0.514512
chr22	29130427	29130427	LCIS	G	A	CHEK2	stopgain	c.C283T	p.R95X	RS587781269	0	1.65e-05	0	420	173	247	0.588095
chr22	29130427	29130427	ILC	G	A	CHEK2	stopgain	c.C283T	p.R95X	RS587781269	0	1.65e-05	0	763	382	381	0.499345
chr22	29121326	29121326	ILC	T	C	CHEK2	nonsynonymous SNV	c.A349G	p.R117G	RS28909982	0.0002	0.0001	0	588	336	252	0.428571
chr22	29121326	29121326	ILC	T	C	CHEK2	nonsynonymous SNV	c.A349G	p.R117G	RS28909982	0.0002	0.0001	0	656	321	335	0.510671
chr16	23632683	23632683	ILC	C	T	PALB2	stopgain	c.G3113A	p.W1038X	RS180177132	0	2.48e-05	0	373	221	152	0.407507
chr16	23632683	23632683	LCIS	C	T	PALB2	stopgain	c.G3113A	p.W1038X	RS180177132	0	2.48e-05	0	936	497	439	0.469017
chr16	23619279	23619279	ILC	G	A	PALB2	stopgain	c.C3256T	p.R1086X		0	8.24e-06	0	1421	745	676	0.475721
chr16	23619279	23619279	ILC	G	A	PALB2	stopgain	c.C3256T	p.R1086X		0	8.24e-06	0	1475	793	682	0.462373
chr16	23646828	23646832	ILC	CTTTT	-	PALB2	frameshift deletion	c.1035_1039del	p.L345fs		0	0	0	699	347	352	0.503577
chr16	23646695	23646695	ILC	G	-	PALB2	frameshift deletion	c.1172delC	p.A391fs		0	0	0	883	418	465	0.526614
chr16	23646552	23646552	ILC	C	-	PALB2	frameshift deletion	c.1315delG	p.G439fs		0	0	0	360	168	192	0.533333
chr16	23647455	23647455	ILC	C	A	PALB2	stopgain	c.G412T	p.E138X		0	0	0	587	290	297	0.505963
chr16	23641425	23641425	Control	G	-	PALB2	frameshift deletion	c.2050delC	p.P684fs		0	0	0	1601	729	872	0.54466
chr16	23641307	23641308	ILC	AT	-	PALB2	frameshift deletion	c.2167_2168del	p.M723fs		0	0	0	1589	796	793	0.499056
chr16	23640988	23640988	ILC	C	-	PALB2	frameshift deletion	c.2487delG	p.Q829fs		0	0	0	825	437	388	0.470303
chr16	23637587	23637587	ILC	C	T	PALB2	stopgain	c.G2718A	p.W906X	RS180177122	0	0	0	1069	516	553	0.517306
chr16	23637556	23637556	ILC	C	T	PALB2	splicing	c.2748+1G>A			0	0	0	821	421	400	0.487211
